# Supplementary material for: Serological Assays Estimate Highly Variable SARS-CoV-2 Neutralizing Antibody Activity in Recovered COVID-19 Patients
Source: PubMed Central journal article supplement (PMC7685895; doi:10.1128/jcm.02005-20), 2020-11-18
Supplement: JCM.02005-20-s0001.pdf [file JCM.02005-20-s0001.pdf]

## Supplementary Material

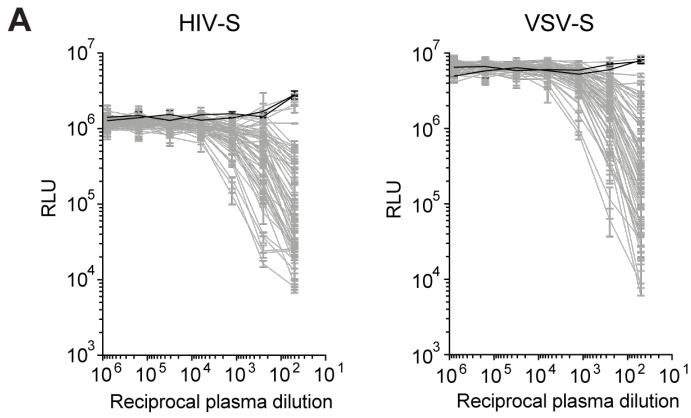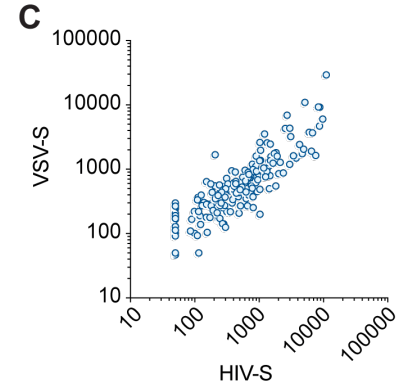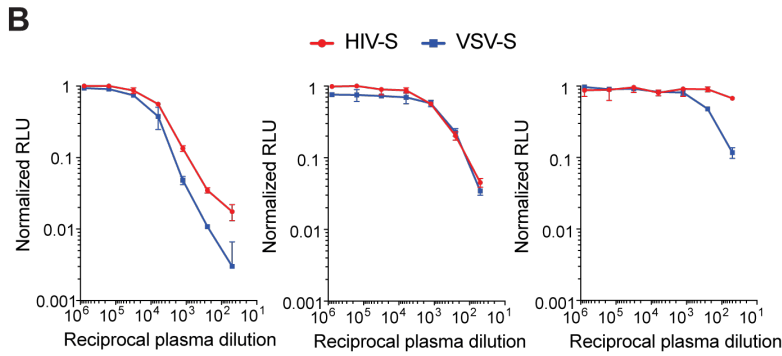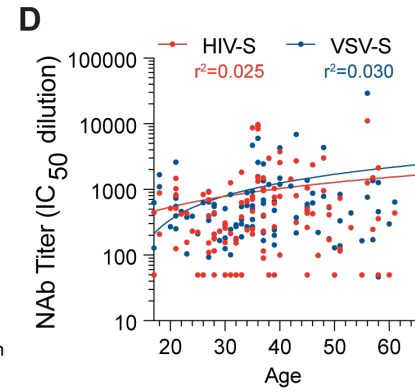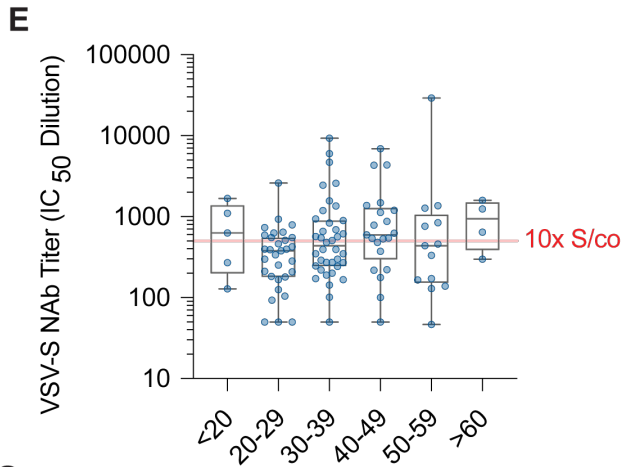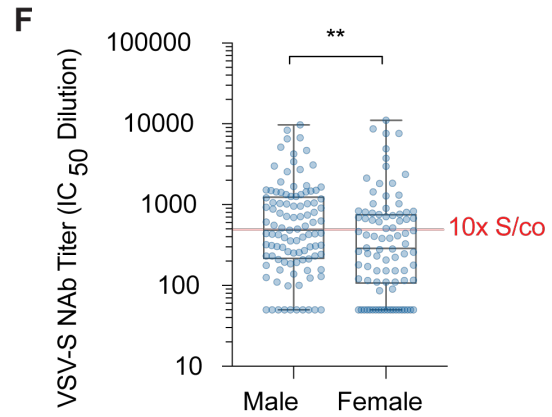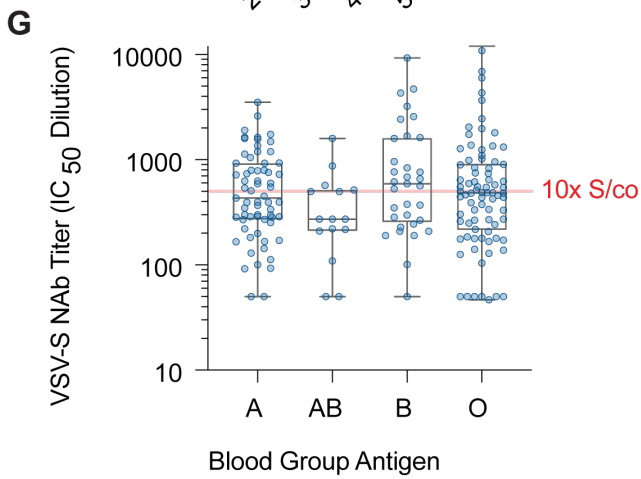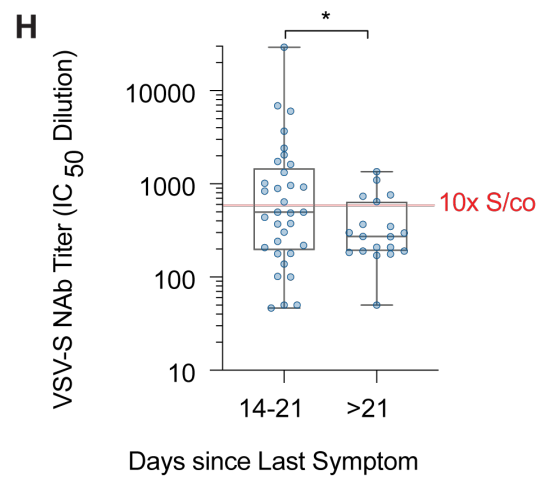

## Supplementary Figure 1

**A;** Neutralization assay plots of serially diluted convalescent plasma (grey lines) compared to FFP controls (black lines) using HIV-S (left) or VSV-S (right) pseudovirus. Values are expressed as reciprocal plasma dilution.

**B;** Representative convalescent plasma donor plots classified as high (left), mid (center) and low (left) neutralization activity using HIV-S (red) or VSV-S (blue).

**C;** Scatterplot of HIV-S versus VSV-S NT50 values from convalescent donors.

**D;** Linear regression of HIV-S (red) and VSV-S (blue) NT50 values versus age. N=150,  $r^2$  = Pearson's correlation coefficient.

**E;** Frequency distribution of convalescent plasma HIV-S NT50 values versus age groups. Signal to cutoff (S/co, dotted grey line) and 10x S/co (solid grey line) thresholds are indicated. n=5-38, Kruskal-Wallis test; \*  $p < 0.05$ .

**F;** Frequency of convalescent plasma donor NT50 values versus sex. Signal to cutoff (S/co, dotted grey line) and 10x S/co (solid grey line) thresholds are indicated. n=190, Mann-Whitney test, \*\*  $p < 0.01$ .

**G;** Frequency of convalescent plasma donor NT50 values versus blood group antigen. Signal to cutoff (S/co, dotted grey line) and 10x S/co (solid grey line) thresholds are indicated. n=15-82, Kruskal-Wallis test, \*  $p < 0.05$ .

**H;** Frequency of convalescent plasma donor NT50 values versus time (days) since last reported symptom. Signal to cutoff (S/co, dotted grey line) and 10x S/co (solid grey line) thresholds are indicated. n=19-33, Mann-Whitney t-test, \* $p < 0.05$ .

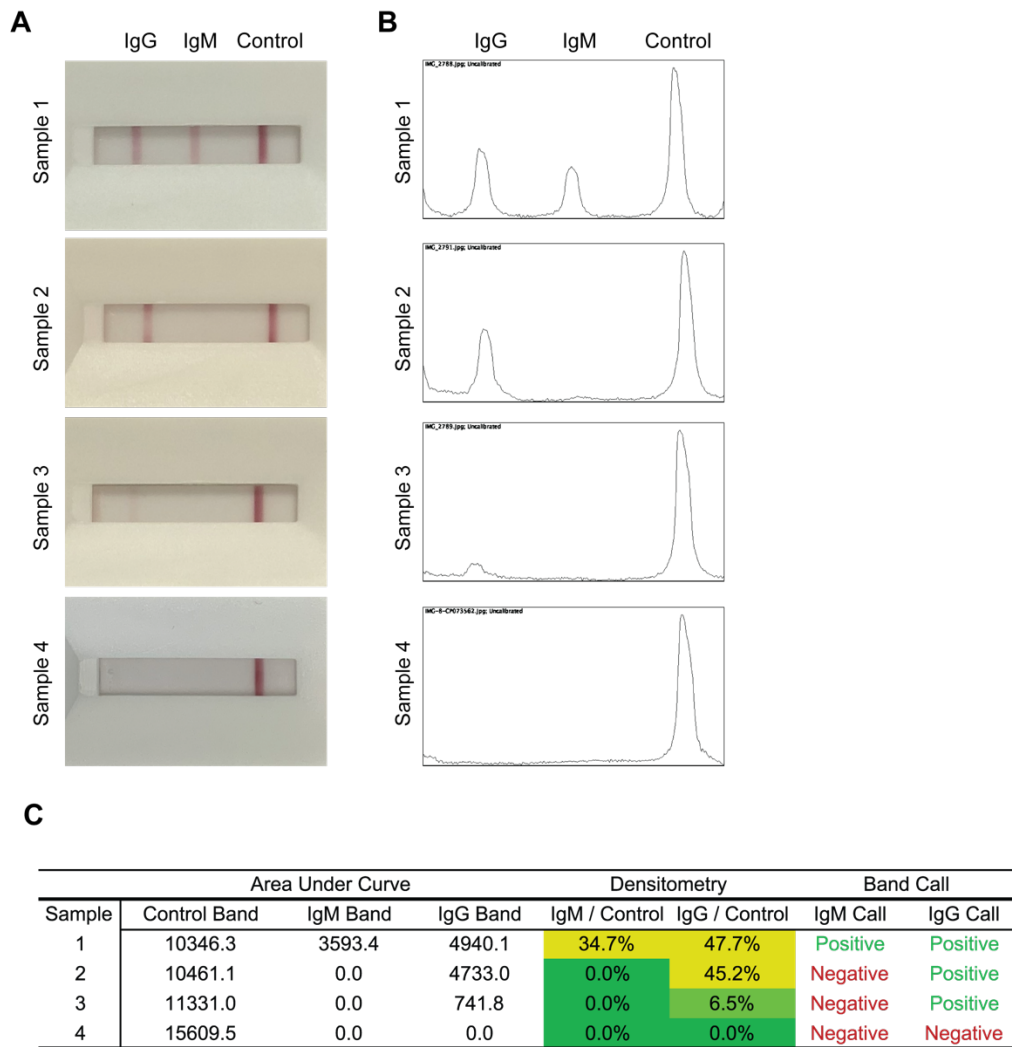

## Supplementary Figure 2

**A**; Representative images of LFA assays performed with convalescent plasma.

**B**; Densitometry plots of band intensities corresponding to images in A.

**C**; Transformation of data from images in A as raw data (area under curve), normalization of IgG and IgM bands to control band (Densitometry), and result assessment as “positive” or “negative”. Densitometry values  $\geq 1\%$  were considered positive.

**A**

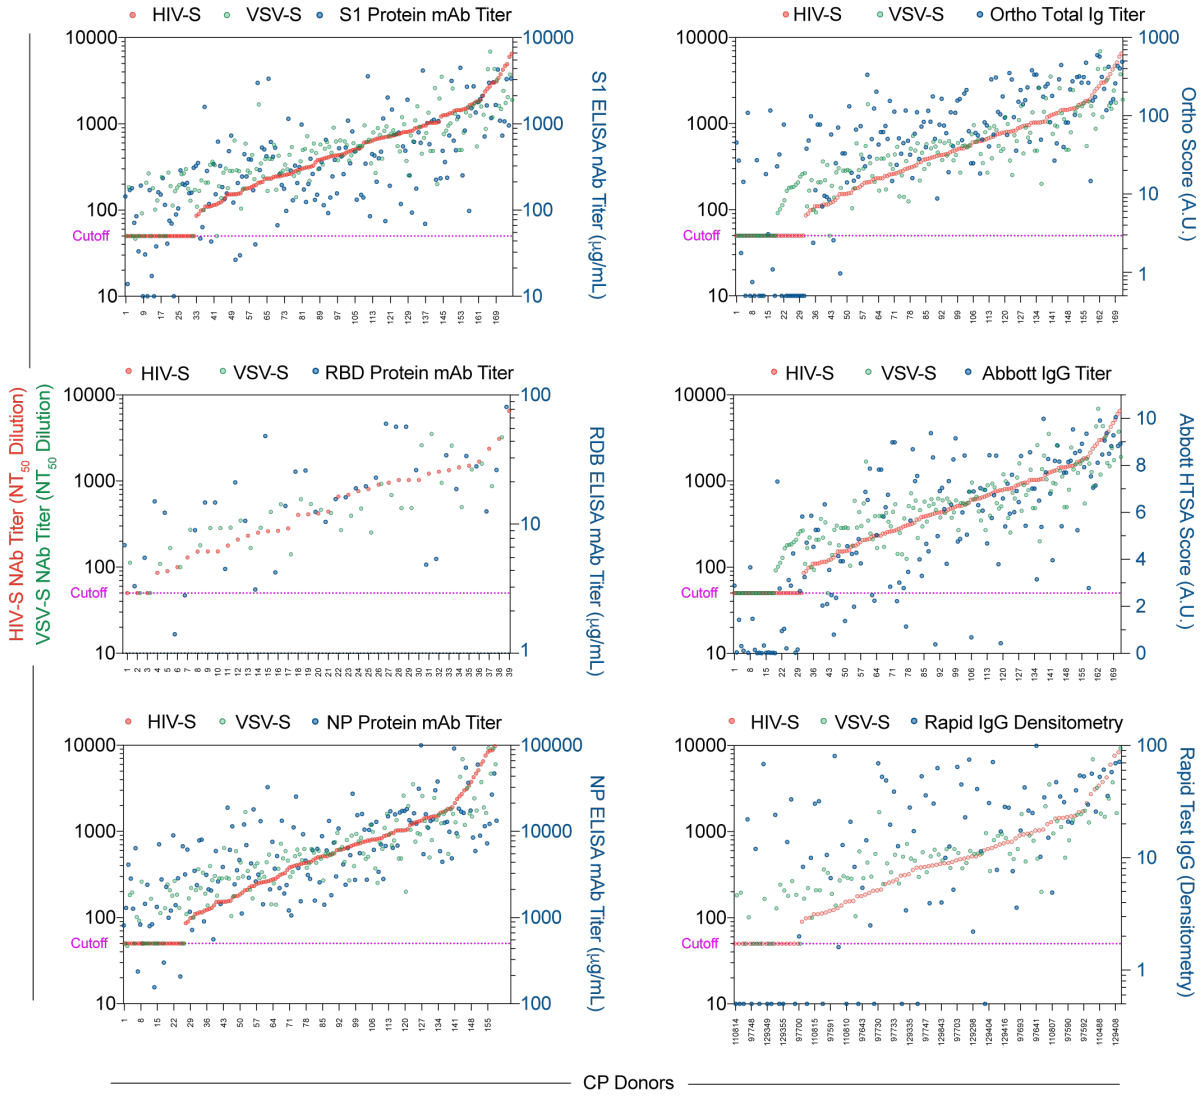

**B**

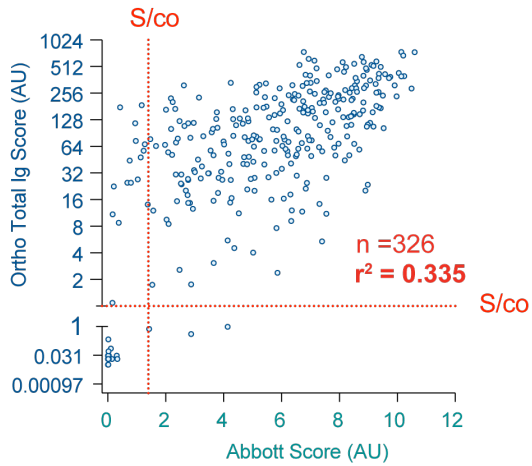

**C**

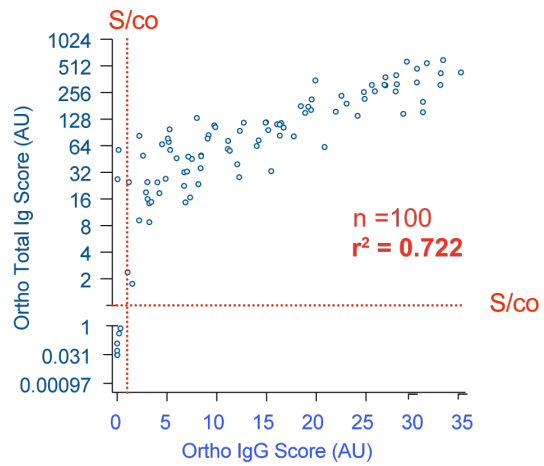

### Supplementary Figure 3

**A;** Overlaid dot plots of serology tests results (blue dots, right ordinate) aligned to rank ordered HIV-S NT50 values (red dots, left ordinate) and corresponding VIV-S NT50 values (green dots, left ordinate). Signal-to-cutoff values are shown in dotted lines.

**B;** Linear regression of Ortho Total Ig HTSA values (abscissa) versus Abbott HSTA values (ordinate). N indicated in each graph,  $r^2$  = goodness of fit.

**C;** Linear regression of Ortho Total Ig HTSA values (abscissa) versus Ortho IgG HSTA values (ordinate). N indicated in each graph,  $r^2$  = goodness of fit.

**A**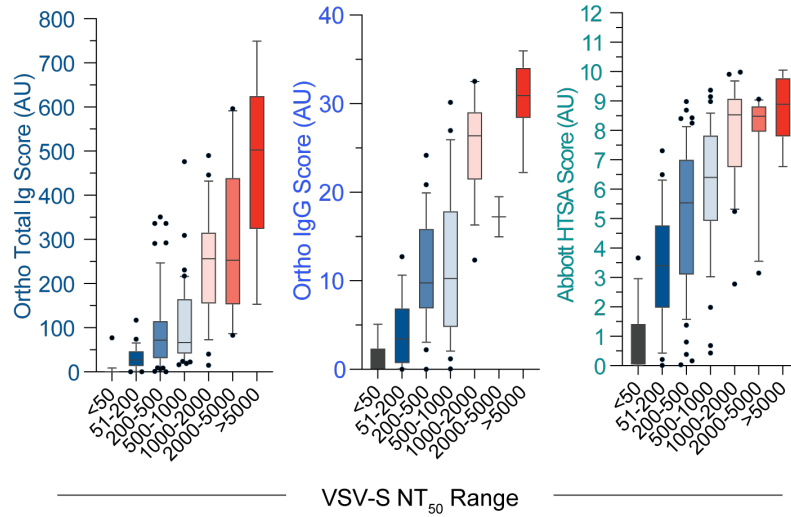**B**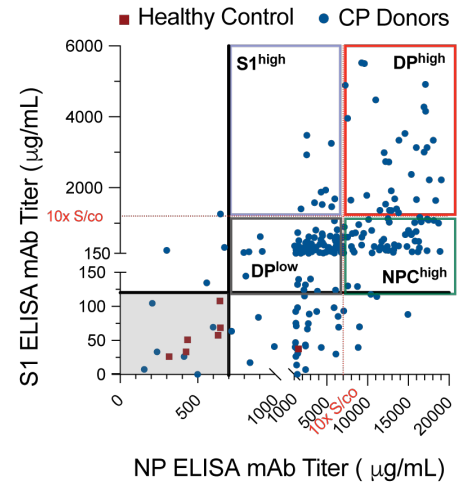**C**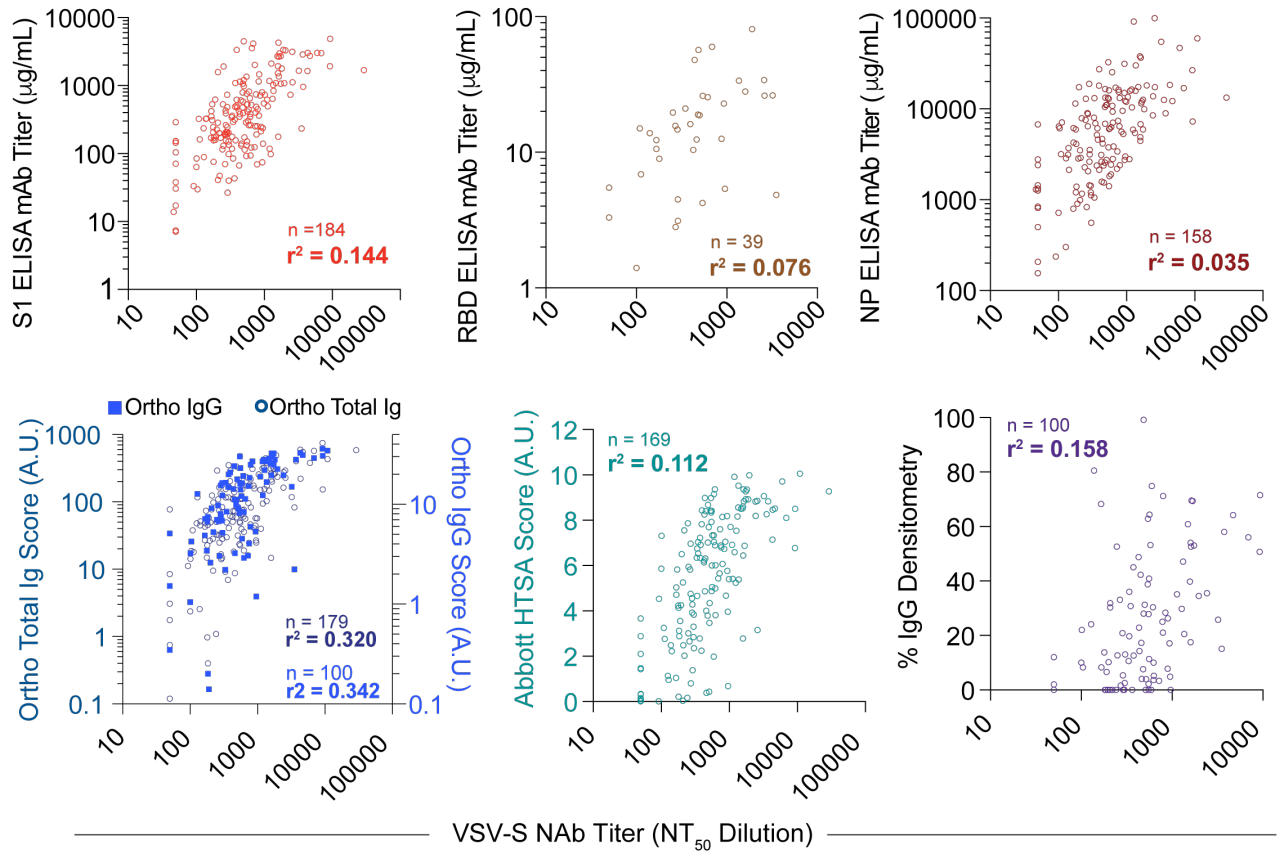

## Supplementary Figure 4

**A;** Distribution of CP donor sample HTSA scores within indicated VSV-S NT50 groups using Ortho (left) or Abbott (right) assays.

**B;** Scatterplot of matched S1 spike protein versus N-protein ELISA values from convalescent donors (blue dots). FFP healthy control values are shown (red squares). Black line denotes signal/cutoff threshold and red dotted line denotes 10x signal/cutoff threshold. n=241 and 7 convalescent donor and FFP samples, respectively.

**C;** Linear regression of VSV-S NT50 values (abscissa) versus serological assay values (ordinate). N indicated in each graph,  $r^2$  = goodness of fit.



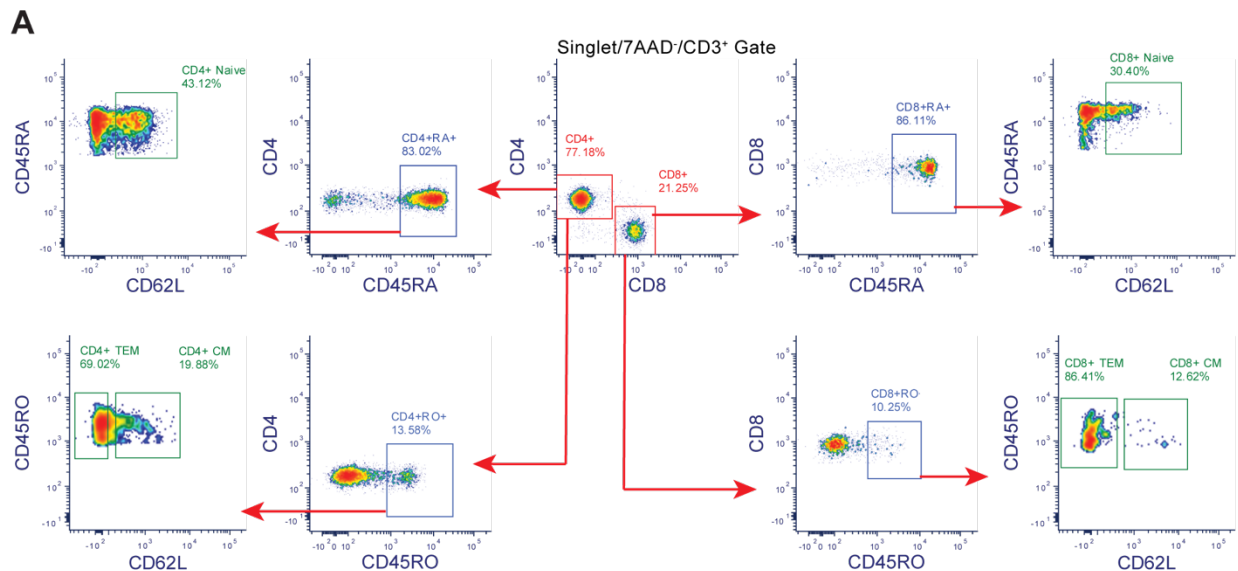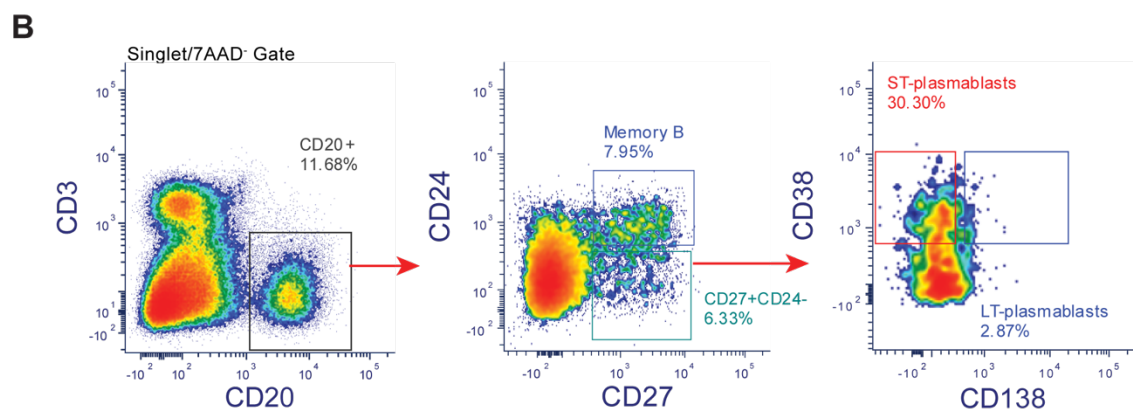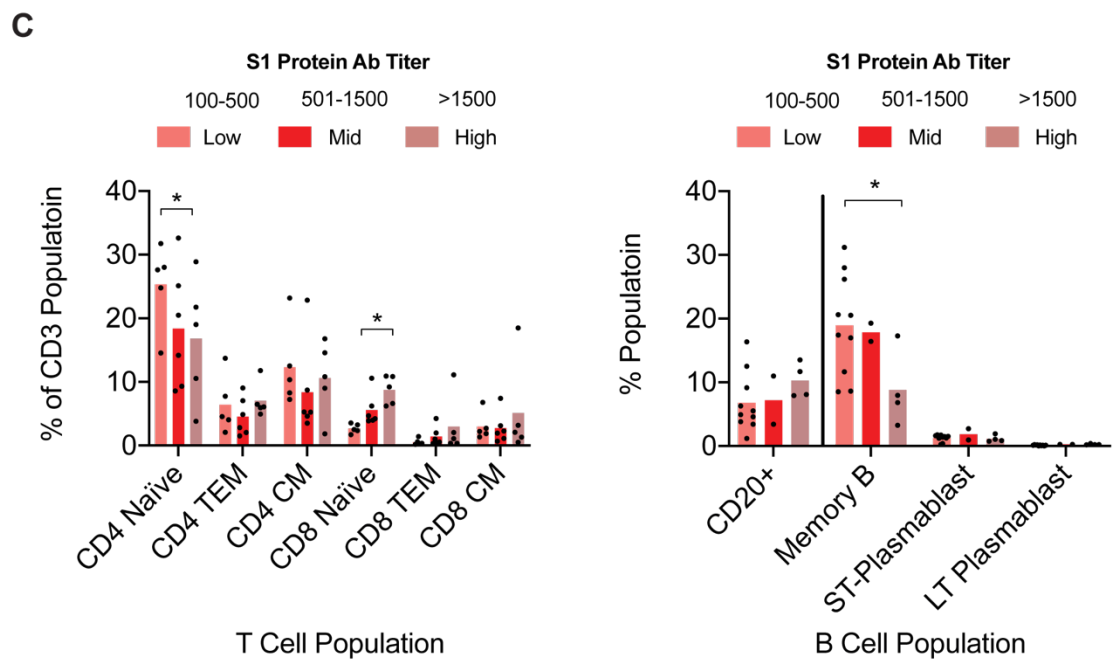

## Supplementary Figure 5

**A;** Gating strategy of PBMC T-cell populations from convalescent donor buffycoats. The CD4/CD8 plot (center) is sub-gated on singlet, viable, CD3<sup>+</sup> cells.

**B;** Gating strategy of PBMC B-cell populations from convalescent donor buffycoats. The CD3/CD20 plot (left) is sub-gated on singlet, viable cells.

**C;** Quantification of PBMC T-cell (left) and B-cell (right) population frequency. Donors were grouped into low, mid and high S1 ELISA antibody titers. N=4-5 per group, two-way ANOVA,  $p < 0.05$ .
